# Supplementary material for: Recovery of Naringin-Rich Flavonoid Extracts from Agroresidues with Anxiolytic- and Antidepressant-like Effects in Mice
Source: MDPI journal article supplement (doi:10.3390/molecules27238507), 2022-12-03
Supplement: s1 [file s1]

## Supplementary Material

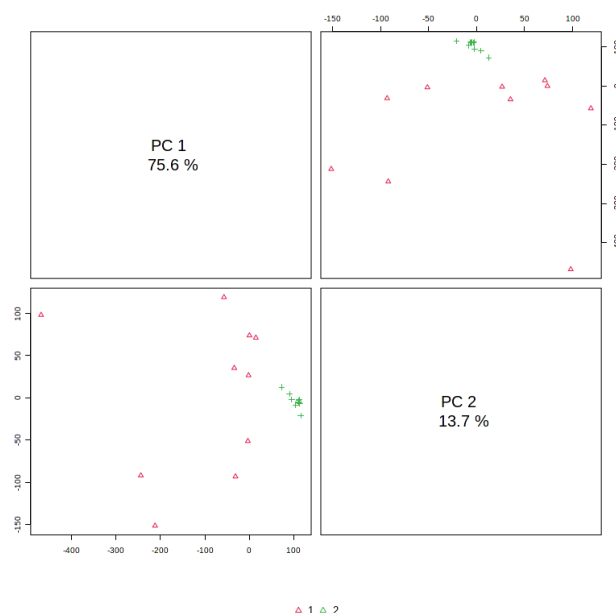

**Figure S1** PC1 and PC2 score plot from  $^1\text{H}$  NMR, red triangles corresponding to methanolic fraction and green to aqueous fraction, explained variance is shown in the corresponding diagonal cell.

**Table S1** Effects of the methanol extract (M1), imipramine (IMI), and fluoxetine (FLX) on the ambulatory activity in the Open Field Test.

| Acute treatment            | Doses (mg/kg) | Rearings number         | Count number            |
|----------------------------|---------------|-------------------------|-------------------------|
| CTL                        | 0             | 33.6 $\pm$ 1.3          | 45.0 $\pm$ 2.3          |
| M1                         | 25            | 30.1 $\pm$ 1.8          | 44.0 $\pm$ 2.1          |
|                            | 50            | 27.6 $\pm$ 2.1          | 41.7 $\pm$ 2.2          |
|                            | 100           | 29.7 $\pm$ 0.9          | 40.0 $\pm$ 2.4          |
|                            | 200           | 29.1 $\pm$ 2.4          | 41.8 $\pm$ 2.7          |
|                            | 400           | 29.2 $\pm$ 1.8          | 41.8 $\pm$ 2.7          |
| IMI                        | 25            | 29.5 $\pm$ 1.33         | 40.7 $\pm$ 2.4          |
|                            |               | H= 5.99, fd= 6, p= 0.42 | H= 2.3, fd= 6, p= 0.88  |
| Repeated treatment (7days) |               |                         |                         |
|                            | 0             | 28.3 $\pm$ 2.5          | 42.7 $\pm$ 4.6          |
|                            | 25            | 27.0 $\pm$ 1.8          | 46.33.0                 |
|                            | 50            | 29.0 $\pm$ 3.1          | 45.2 $\pm$ 4.4          |
|                            | 100           | 25.0 $\pm$ 0.8          | 42.2 $\pm$ 2.8          |
|                            | 200           | 27.3 $\pm$ 2.8          | 39.6 $\pm$ 3.4          |
| FLX 5                      | 5             | 28.2 $\pm$ 1.5          | 49.12 $\pm$ 4.6         |
|                            |               | H= 2.31, fd= 5, p=0.80  | H= 4.369, fd=5, p= 0.49 |

**Table S2** Effect of diazepam (DZ) on the ethological behaviors on the Elevated Plus Maze Test (EPM). \*  $p \leq 0.05$ , \*\*  $p \leq 0.01$ , \*\*\*  $p \leq 0.001$

| Treatment/dose<br>(mg/kg) | CPT (s)<br>mean $\pm$ sem       | head dipping number<br>(mean $\pm$ sem) | stretches number<br>(mean $\pm$ sem) |
|---------------------------|---------------------------------|-----------------------------------------|--------------------------------------|
| CTL                       | 82.8 $\pm$ 6.1                  | 15.7 $\pm$ 0.8                          | 31.8 $\pm$ 1.9                       |
| 25                        | 83.4 $\pm$ 9.2                  | 20.7 $\pm$ 1.5*                         | 23.8 $\pm$ 1.8                       |
| 50                        | 77.7 $\pm$ 12.8                 | 30.7 $\pm$ 2.1***                       | 18.0 $\pm$ 1.0***                    |
| 100                       | 64.1 $\pm$ 1.1                  | 30.2 $\pm$ 2.3***                       | 21.3 $\pm$ 1.1***                    |
| 200                       | 87.0 $\pm$ 10.09                | 17.7 $\pm$ 1.3                          | 24.6 $\pm$ 0.8***                    |
| 400                       | 69.3 $\pm$ 5.6                  | 13.7 $\pm$ 1.0                          | 27.7 $\pm$ 1.8                       |
|                           | H=6.4, fd=5, $p=0.26$           | H=32.3, fd=5,<br>$p \leq 0.001$         | H=25.2, fd=5, $p \leq 0.001$         |
| CTL                       | 66.9 $\pm$ 5.1                  | 16.7 $\pm$ 0.6                          | 24.3 $\pm$ 1.7                       |
| DZ 0.25                   | 72.1 $\pm$ 5.8                  | 12.2 $\pm$ 0.7+                         | 24.1 $\pm$ 1.6                       |
| DZ 0.5                    | 94.7 $\pm$ 8.7**                | 21.3 $\pm$ 1.0**                        | 21.0 $\pm$ 1.1                       |
| DZ 1.0                    | 85.0 $\pm$ 8.7                  | 26.2 $\pm$ 0.9***                       | 14.1 $\pm$ 0.6**                     |
| DZ 2.0                    | 55.5 $\pm$ 5.5                  | 35.6 $\pm$ 1.1***                       | 12.5 $\pm$ 0.5***                    |
|                           | H = 23.6, fd= 4, $p \leq 0.001$ | H = 41.7, fd= 4, $p \leq 0.001$         | H = 32.6, fd=4,<br>$p \leq 0.001$    |
